# Supplementary material
Source: Research Square preprint supplement (doi:10.21203/rs.3.rs-9090665/v1)
Supplement: Supplementary file 1 [file 7b9d9e3461486ac292065dd3.docx]

Supplementary Materials for

**PD-1 blockade-induced CD4+ T cell** **dysregulation triggers dopaminergic neurodegeneration in Parkinson’s disease**

Luyan Gu *et al.*

*Corresponding author: Jiali Pu, [jialipu@zju.edu.cn](mailto:jialipu@zju.edu.cn); Baorong Zhang, [brzhang@zju.edu.cn](mailto:brzhang@zju.edu.cn)

**This PDF file includes:**

Figs. S1 to S3

Table S1 to S2


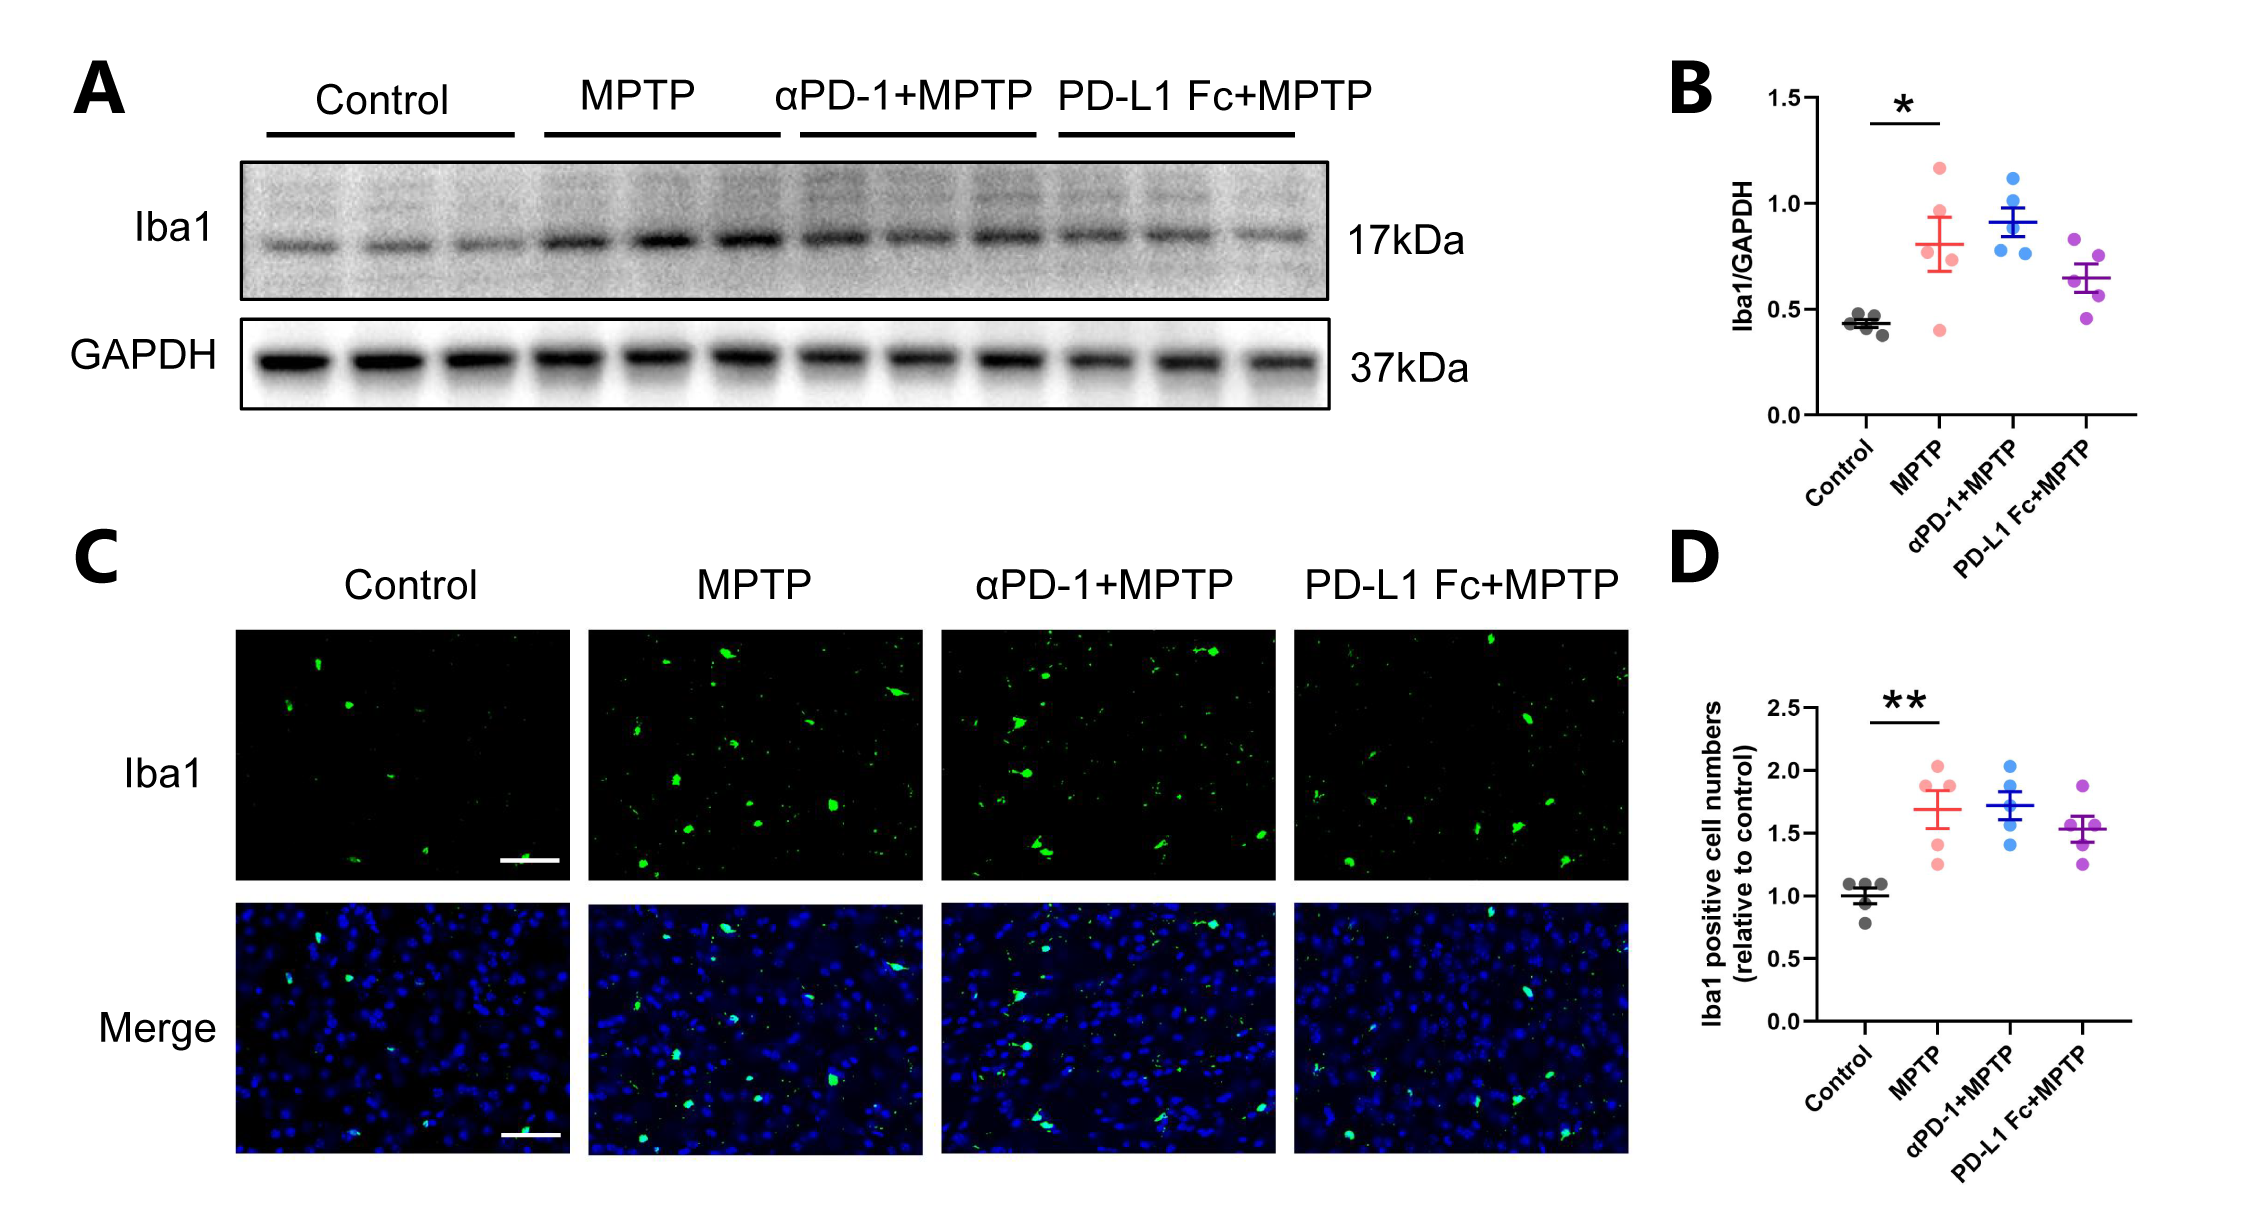


**Figure S1. Microglia-mediated innate immune responses did not change significantly after PD-1/PD-L1 treatment. (A)** Western blot showed the expressions of Iba1 in striatum in control, MPTP, anti-PD-1-treated and PD-L1 Fc-treated group. **(B)** Quantification of Iba1 levels in the different treatment groups (n=5). **(C)** Representative immunofluorescence staining of Iba1 positive cells in the SNc of the mouse brain after PD-1 antibody or PD-L1 Fc treatment. Scale bar: 50 µm.  **(D)** Quantification of Iba1 positive cells in the SNc of the mouse brain in the different treatment groups (n=5). Data are represented as mean ± SEM. *p < 0.05; **p < 0.01; ***p < 0.001.


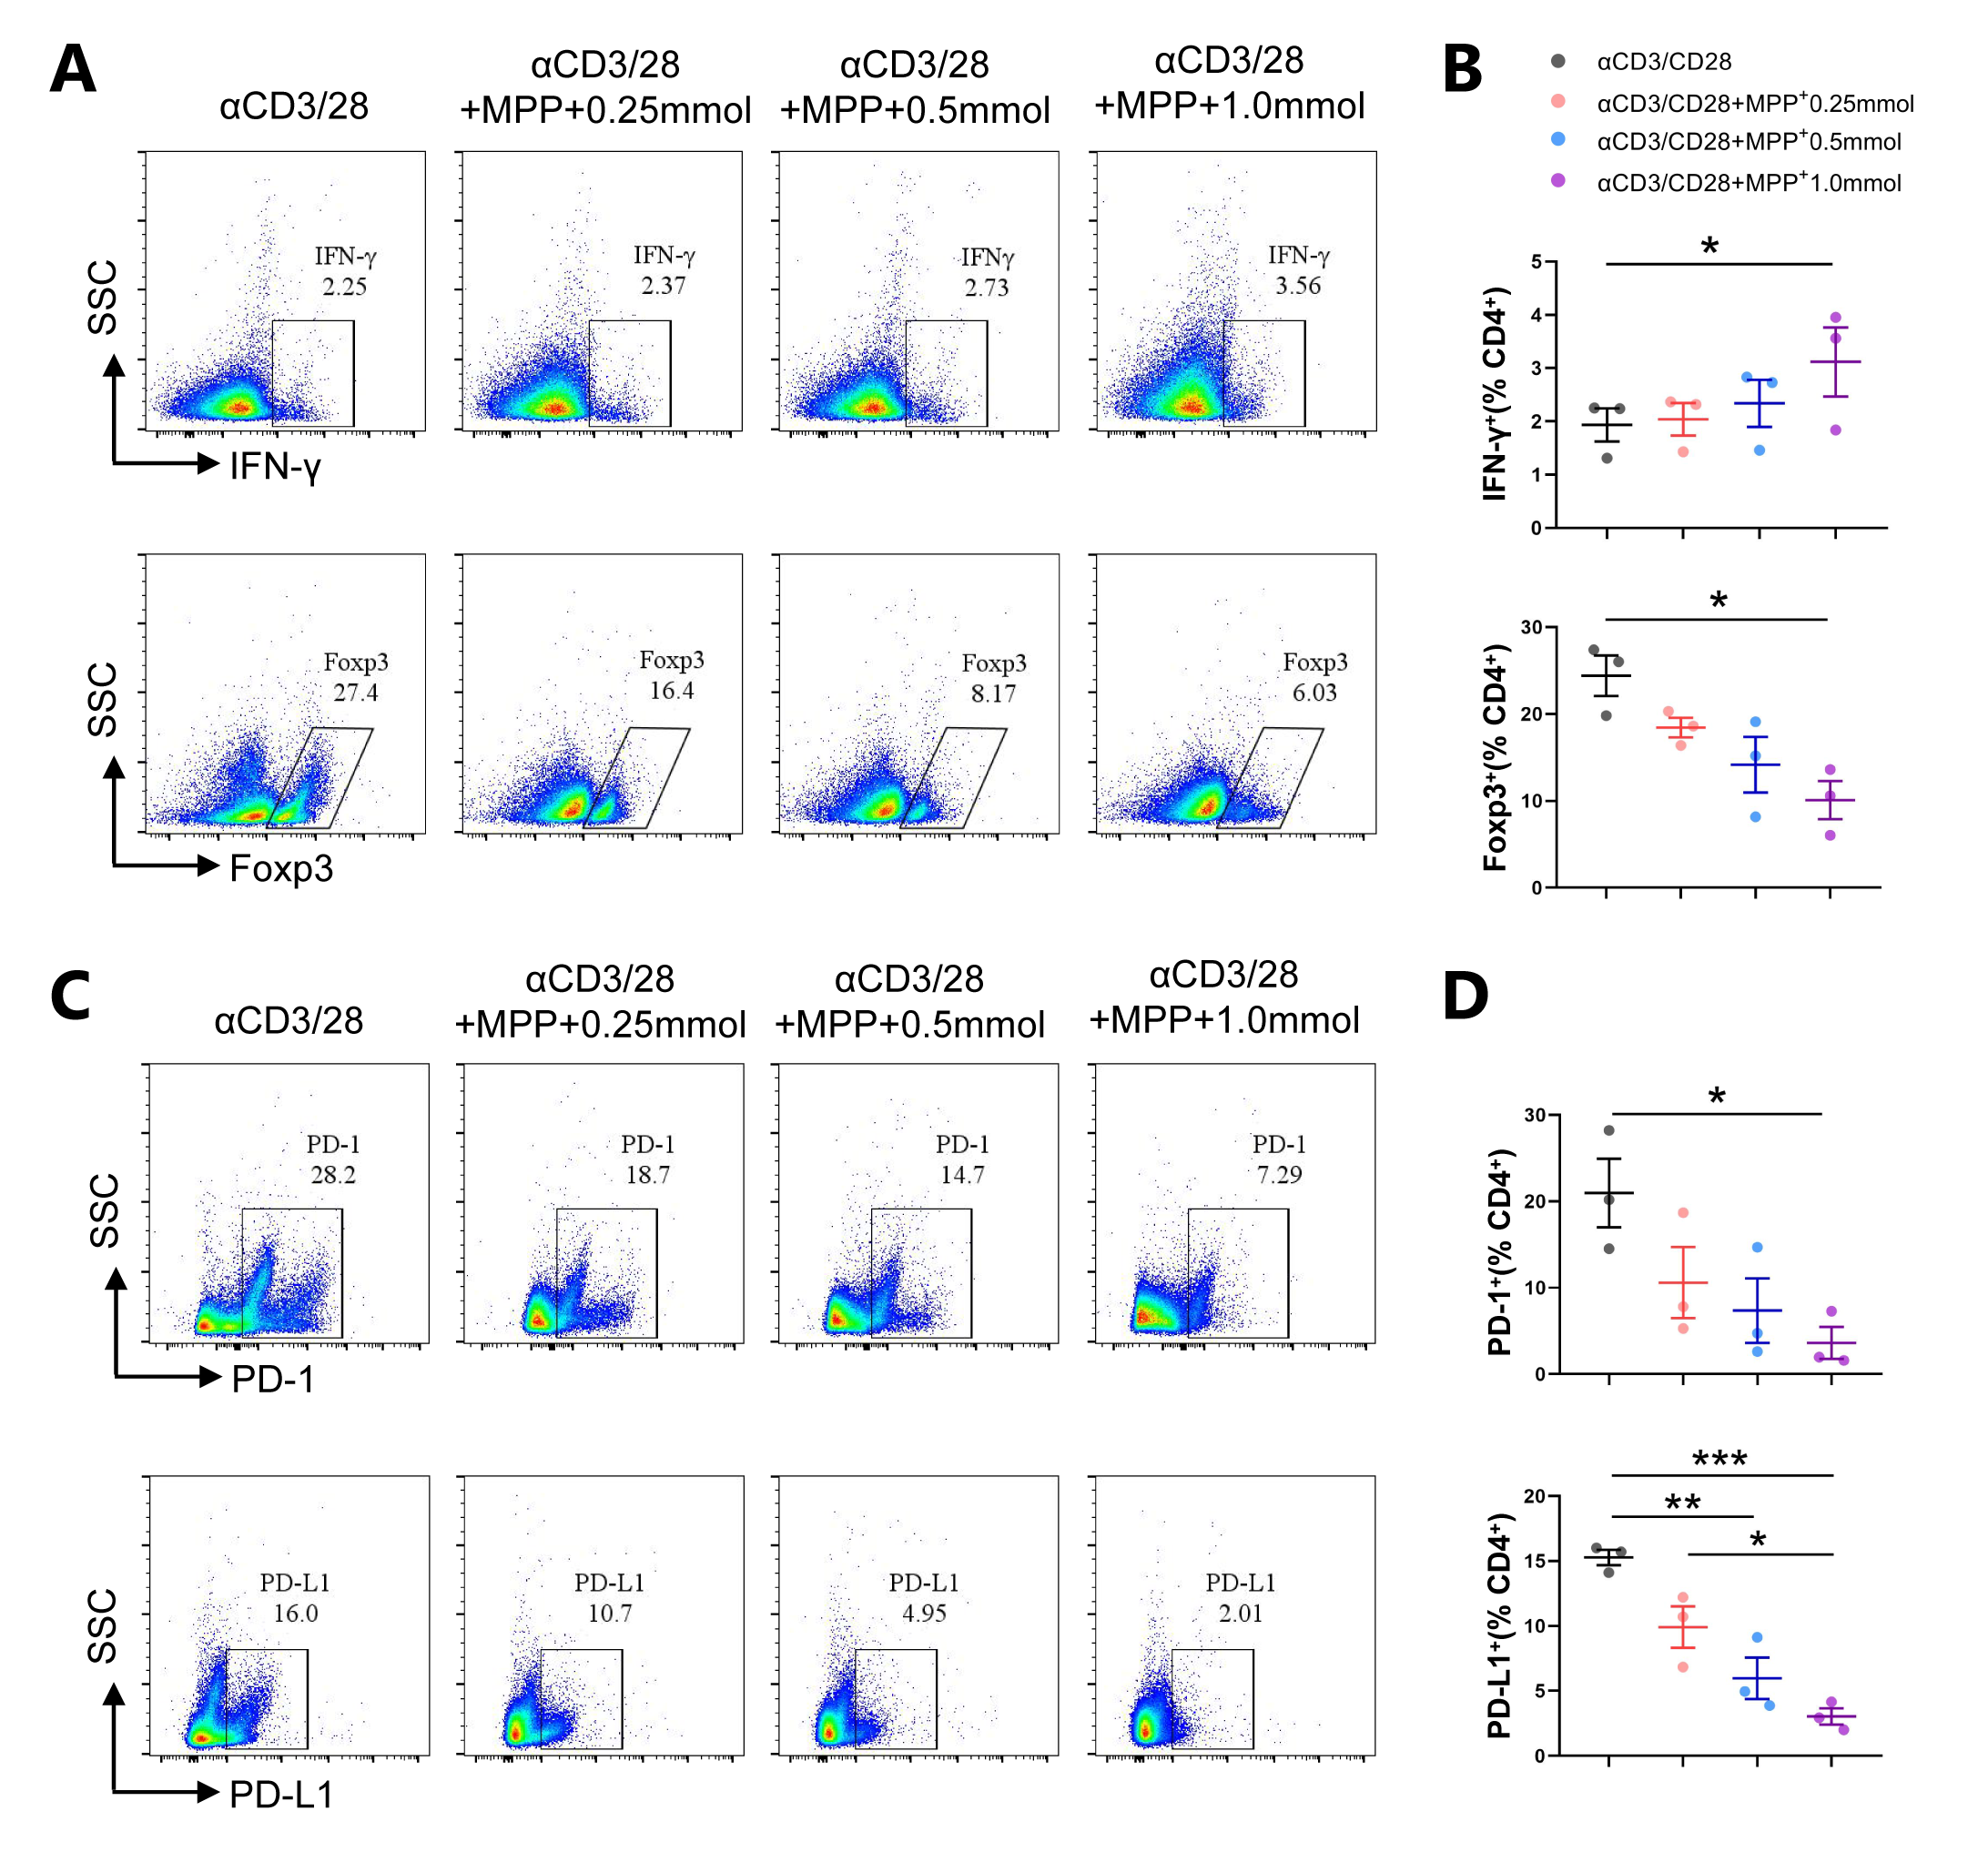


**Figure S2. MPP+ stimulation of primary CD4+ T cells can affect Treg and Th1 cell differentiation in vitro. (A)** Representative flow cytometry plots of Th1 and Treg polarization of CD4+ T cells treated with different concentrations of MPP+stimulation (0.25 mmol, 0.5 mmol, 1.0 mmol). **(B)** Quantification of population frequency of Th1 and Treg in the different treatment groups (n=3). **(C)** Representative flow cytometry plots of PD-1 and PD-L1 on CD4+ T cells treated with different concentrations of MPP+stimulation. **(D)** Quantification of population frequency of PD-1 and PD-L1 on CD4**+** T cells in the different treatment groups (n=3). Data are represented as mean ± SEM. *p < 0.05; **p < 0.01; ***p < 0.001.

**
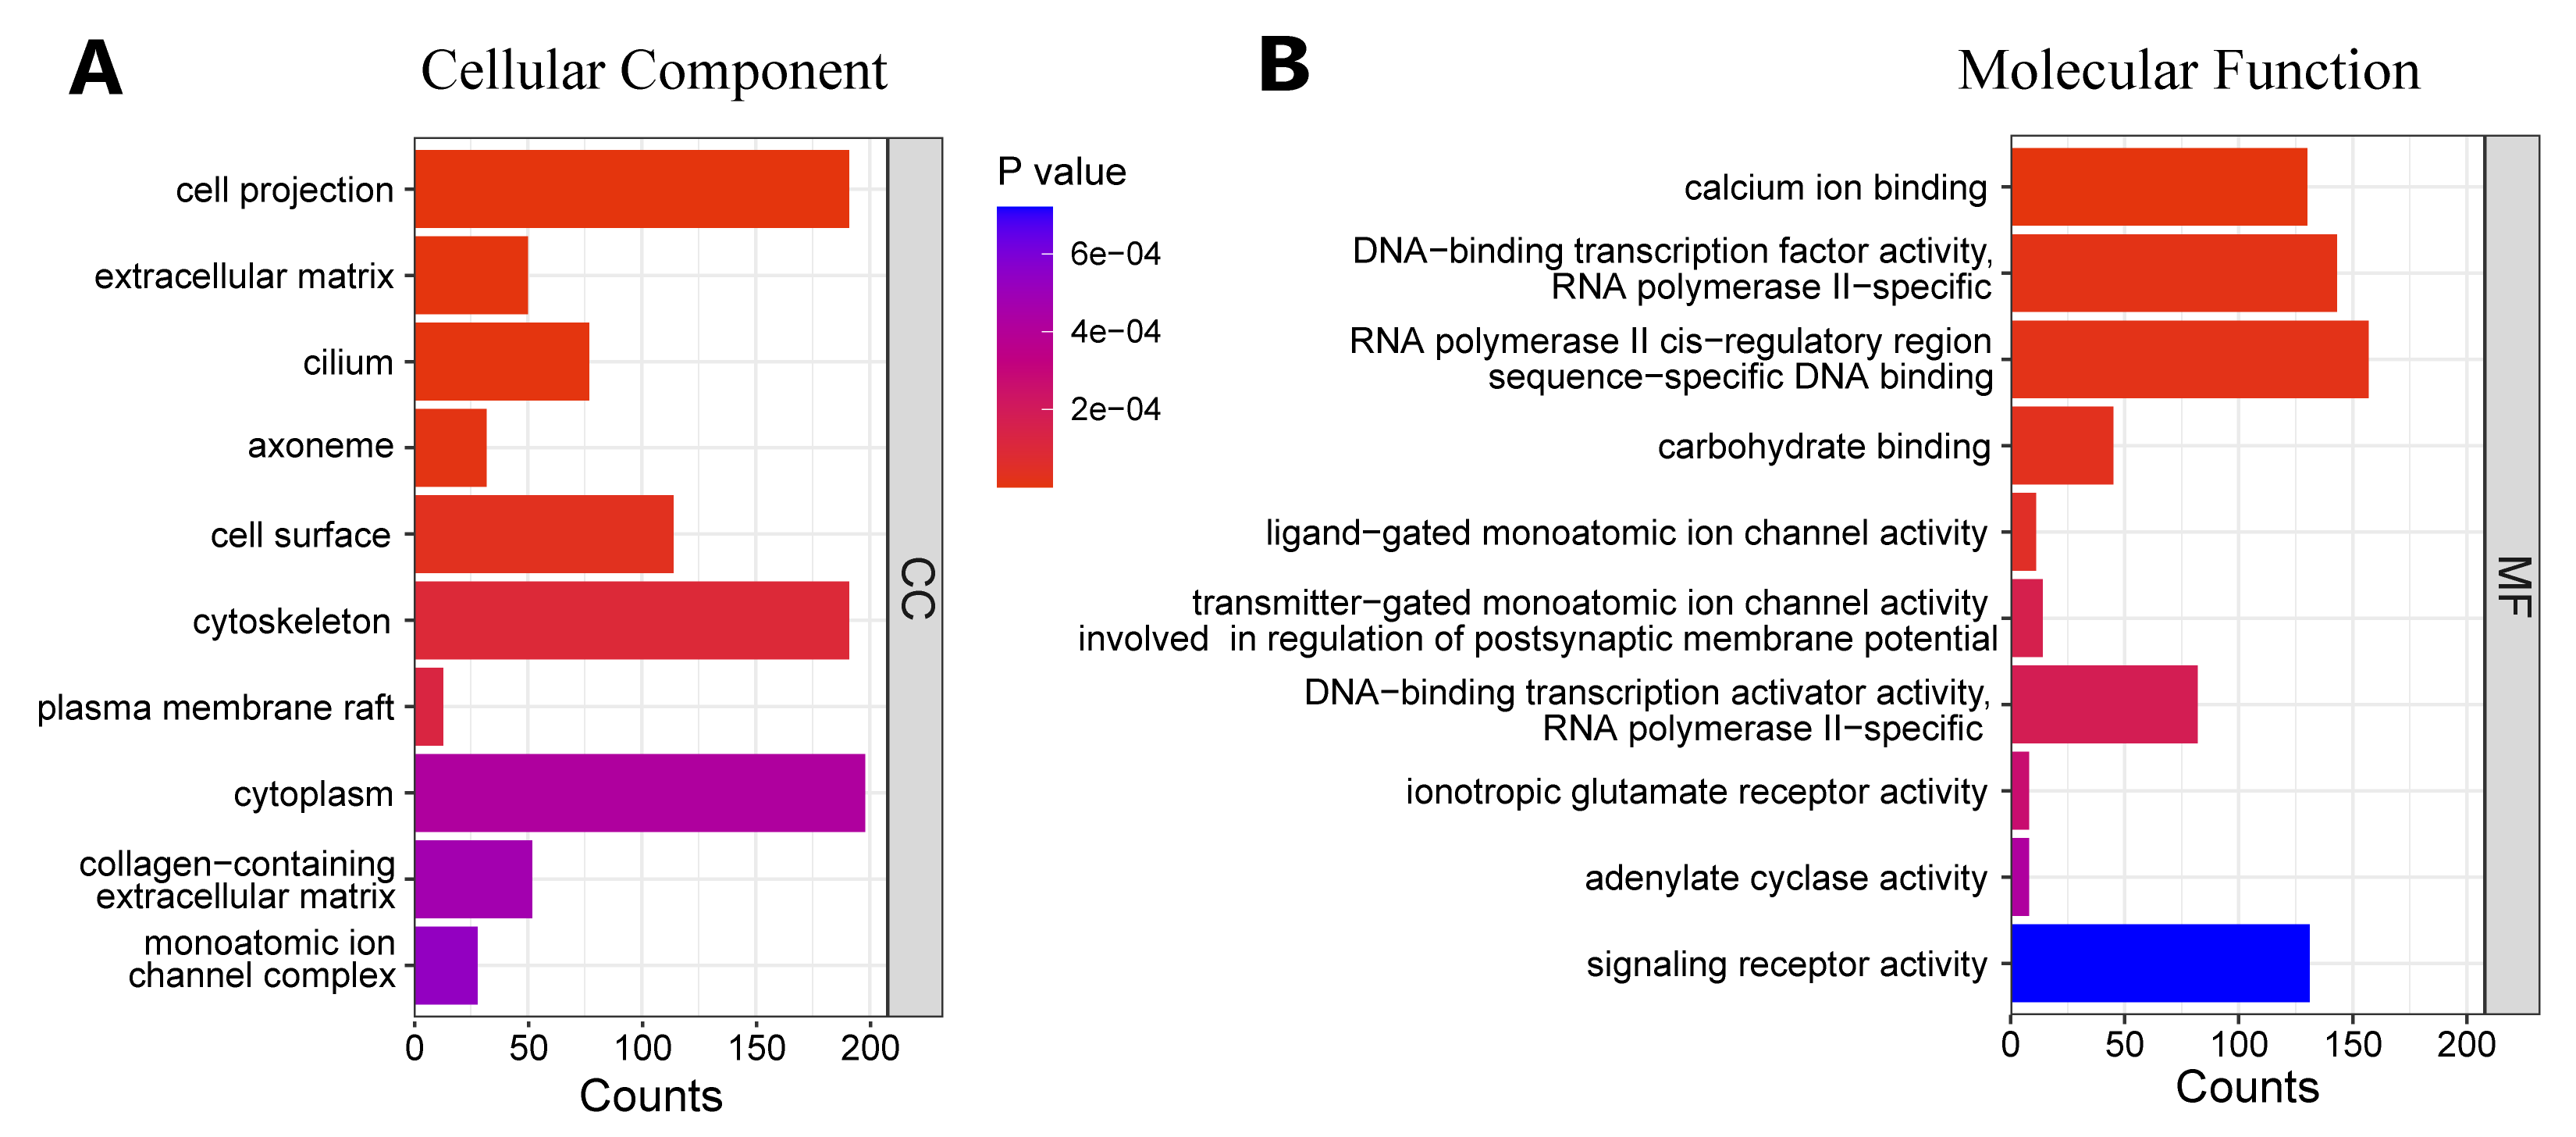
**

**Figure S3. Analyze the changes in cellular components and molecular functions under the PD-1/PD-L1 signaling pathway using Gene Ontology (GO) enrichment analysis. (A)** GO enrichment analysis revealed that PD-1/PD-L1 signaling is implicated in following cellular component (CC), including cell projection, extracellular matrix, and cell surface. **(B)** GO enrichment analysis revealed that molecular function (MF) such as calcium ion binding and signaling receptor activity exhibited differences under the PD-1/PD-L1 signaling.

**Table S1. Baseline demographic and clinical characteristics of the four groups.**

|  | YHCs  (n=10) | EOPD  (n=10) | OHCs  (n=8) | LOPD  (n=12) | P value  (EOPD vs LOPD) |
| --- | --- | --- | --- | --- | --- |
| Age (y) | 40.30±4.45 | 40.30±3.63 | 68.25±7.74 | 64.23±7.08 | **＜0.001c** |
| Gender (F/M) | 1/9 | 3/7 | 4/4 | 4/5 | 0.867a |
| Age of onset (y) | - | 37.87±4.00 | - | 62.44±7.52 | **＜0.001c** |
| Disease duration (y) | - | 2.44±2.04 | - | 1.79±1.74 | 0.356b |
| H–Y stage | - | 1.31±0.46 | - | 1.43±0.50 | 0.596b |
| UPDRS-Total | - | 26.50±12.54 | - | 32.38±10.20 | 0.321c |
| UPDRS-III | - | 15.37±7.41 | - | 21.63±5.76 | 0.080c |
| MMSE | - | 26.63±3.07 | - | 26.38±4.37 | 0.897c |
| MoCA | - | 25.00±2.88 | - | 23.25±3.28 | 0.276c |

All values are expressed as mean ± SD. Error bars show the mean ± standard error of the mean (SEM). OHCs older adult healthy controls, EOPD early onset-PD, LOPD late onset-PD, YHCs young healthy controls, UPDRS unified Parkinson’s disease rating scale, H–Y Hoehn–Yahr, MoCA Montreal cognitive assessment. a:[chi-square test](http://www.baidu.com/link?url=h7BjmDpQnPM5pUbjy8XbWyoUyHXQSBRLVlZm8eV8tEGH05tXg8NZqaI8XzXP1DnemK39nvUuO8Ro0t-byM9LdmJ5cJQll34Qd34JPHzQrWInNBIK99PjuR83PqWTjhRt); b:Mann-Whitney U test; c:Student's t test.

**Table S2.** **The primer sequences used in this study.**

| **Target** | **Forword** | **Reverse** |
| --- | --- | --- |
| ZO-1 | GATGTTTATGCGGACGGTGG | CATTGCTGTGCTCTTAGCGG |
| Occludin | TCTTTCCTTAGGCGACAGCG | AGATAAGCGAACCTGCCGAG |
| Claudin-5 | TTTAGCCATGGGGTCTGCAG | CCTACCAGACACAGCACCAG |
| CD31 | GAGCCTCACCAAGAGAACGG | CTCTTCTCGGGACATGGACG |
